# Supplementary material for: A novel l-histidine based ionic liquid (LHIL) as an efficient corrosion inhibitor for mild steel
Source: Royal Society of Chemistry journal article supplement (doi:10.1039/d1ra08275b), 2022-01-01

**Supporting information for:**  
**The Novel L-histidine Based Ionic Liquid (LHIL) as An Efficient  
Corrosion Inhibitor for Mild Steel**

Jing Wang,<sup>a</sup> Chengbao Liu,<sup>b</sup> Bei Qian<sup>c,\*</sup>

<sup>a</sup> *Institute of Oceanographic Instrumentation, Qilu University of Technology (Shandong Academy of Sciences), Shandong Provincial Key Laboratory of Marine monitoring instrument equipment technology, National Engineering and Technological Research Center of Marine Monitoring Equipment, 37 Miaoling Road, Qingdao 266061, China*

<sup>b</sup> *College of Materials Science and Engineering, Shandong University of Science and Technology, Qingdao 266590, China*

<sup>c</sup> *College of Chemistry and Pharmaceutical Sciences, Qingdao Agricultural University, Qingdao 266109, China*

\*Corresponding author: Bei Qian ([bqian@qau.edu.cn](mailto:bqian@qau.edu.cn))

**Fig. S1.**  $^1\text{H-NMR}$  (DMSO- $d_6$ ) spectrum of LHIL.

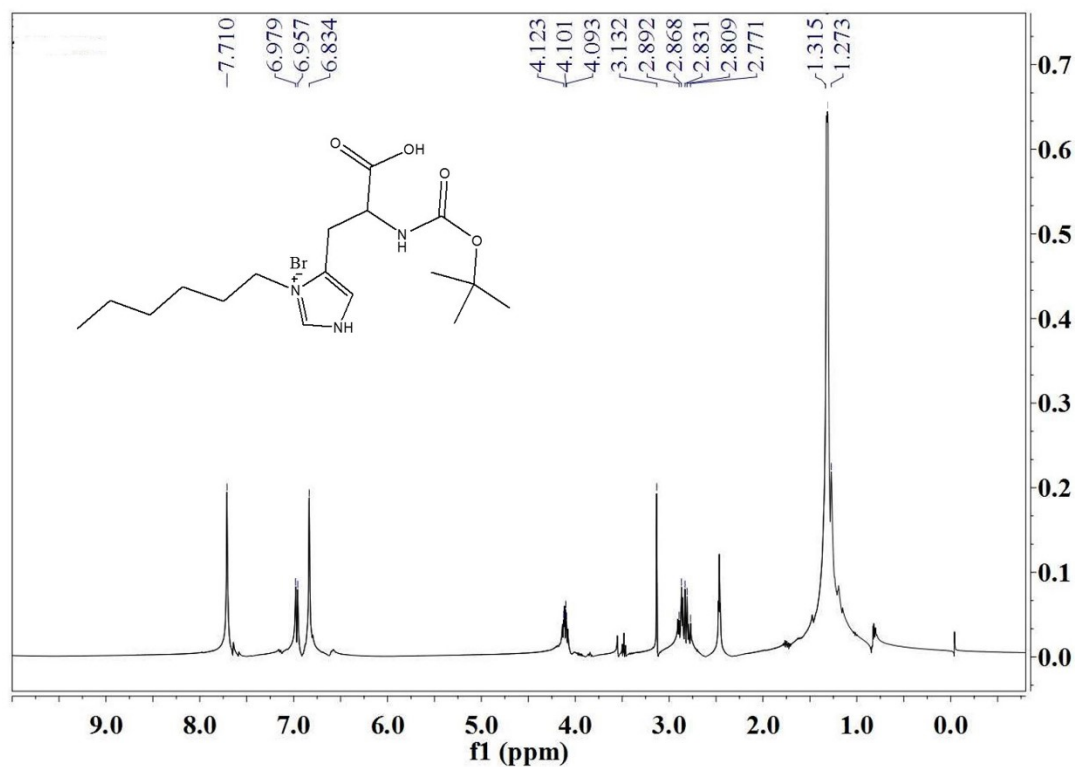

**Fig. S2.** HRMS (ESI) spectrum of LHIL.

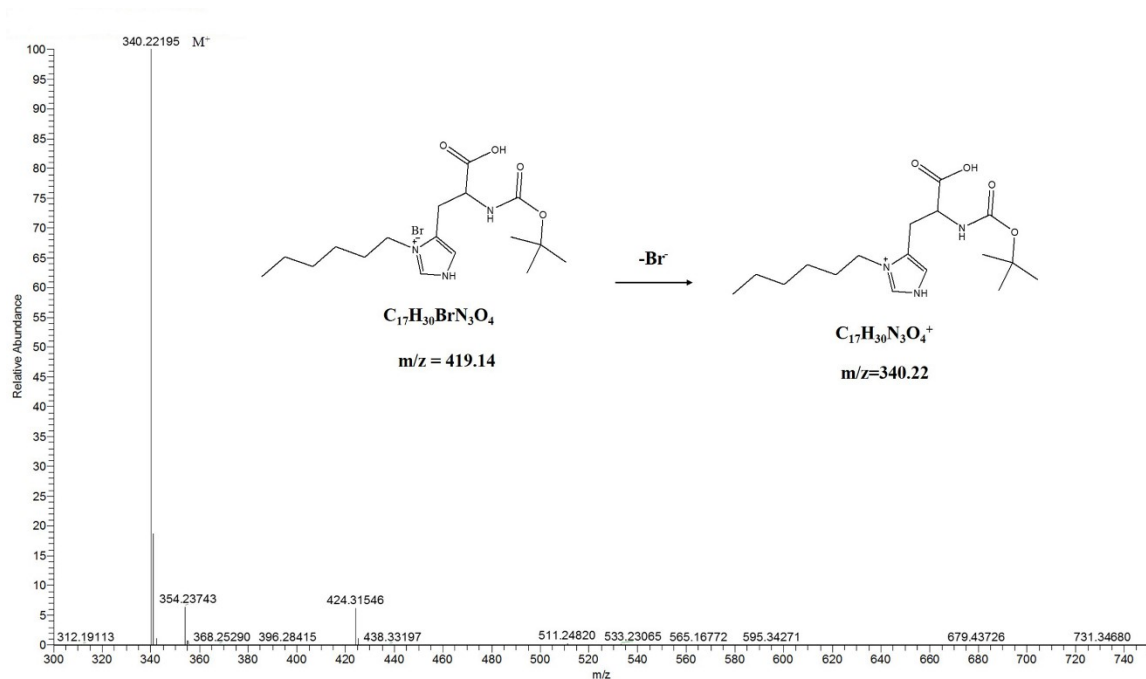

**Fig. S3.** The surface compositions of carbon steel under different conditions.

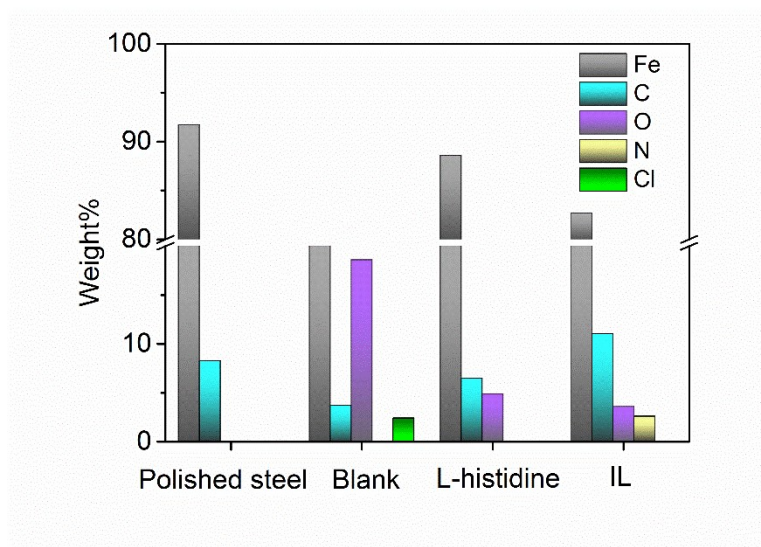

Supplement: d1ra08275b1.pdf [file d1ra08275b1.pdf]
